# Supplementary material
Source: PubMed Central journal article supplement (PMC5210056)
Supplement: PulmCirc-006-472.s001.pdf [file PulmCirc-006-472.s001.pdf]

## Appendix from Gall et al., “An international physician survey of chronic thromboembolic pulmonary hypertension management” (Pulm. Circ., vol. 6, no. 4, p. 472)

Table S1. Physician sample, continued

|                                               | UK         | FR          | DE         | IT         | ES       | US         | AR        | JP        |
|-----------------------------------------------|------------|-------------|------------|------------|----------|------------|-----------|-----------|
| No. of physicians                             | 50         | 52          | 51         | 50         | 57       | 152        | 52        | 32        |
| Patients with CTEPH<br>currently managed, %   |            |             |            |            |          |            |           |           |
| 2–10                                          | 52         | 55.8        | 33.3       | 62         | 56.1     | 36.8       | 98.1      | 81.2      |
| 11–20                                         | 12         | 17.3        | 25.5       | 18         | 24.6     | 18.4       | 0         | 3.1       |
| 21–30                                         | 14         | 3.8         | 23.5       | 4          | 3.5      | 10.5       | 0         | 0         |
| 31 or more                                    | 22         | 23.1        | 17.6       | 16         | 15.8     | 34.2       | 1.9       | 0         |
| Patients with CTEPH<br>currently managed, no. |            |             |            |            |          |            |           |           |
| Mean ± SEM                                    | 27.6 ± 5.9 | 37.8 ± 11.2 | 25.9 ± 4.7 | 21.4 ± 4.9 | 17 ± 2.5 | 38.4 ± 5.1 | 6.3 ± 2.8 | 4.5 ± 0.7 |
| Median                                        | 10         | 10          | 18         | 10         | 10       | 20         | 3         | 3         |

Note: AR: Argentina; CTEPH: chronic thromboembolic pulmonary hypertension; DE: Germany; ES: Spain; FR: France; IT: Italy; JP: Japan; SEM: standard error of the mean; UK: United Kingdom; US: United States.

A) Europe: PH Center

Clinical evaluation for PEA in patients with CTEPH receiving PAH-specific drug therapy: patient records (PH center)

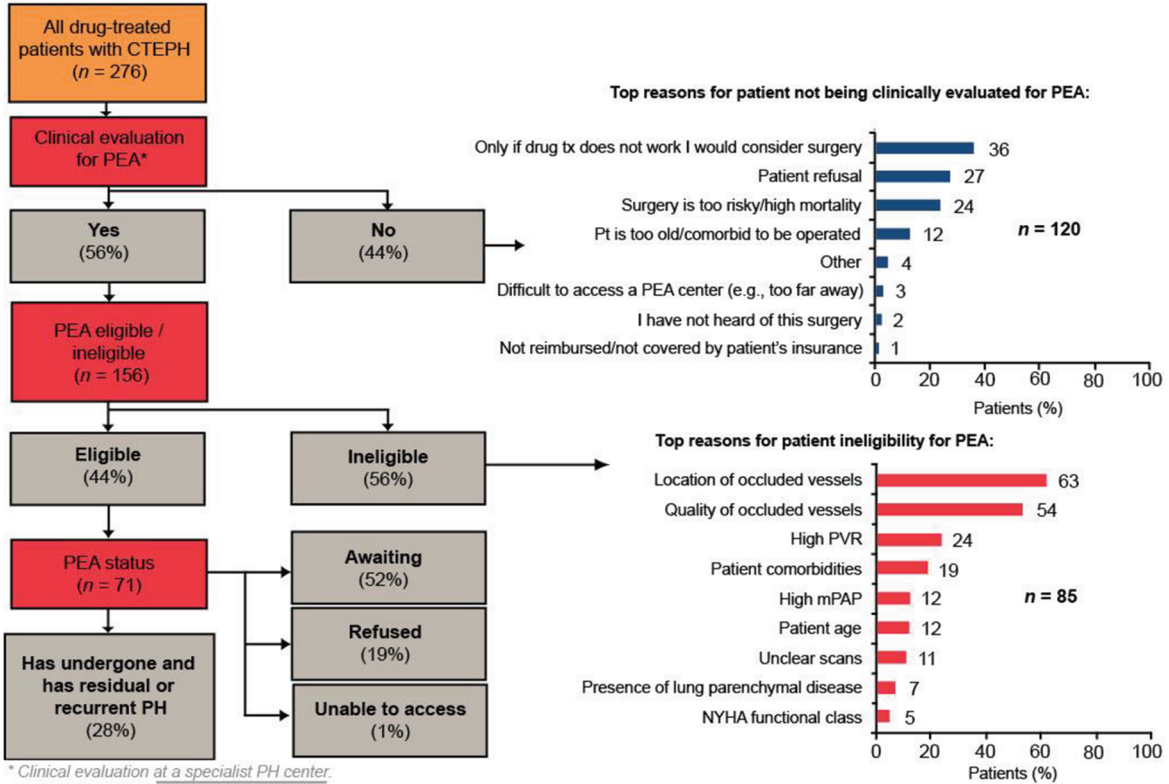

B) Europe: non-PH center

Clinical evaluation for PEA in patients with CTEPH receiving PAH-specific drug therapy: patient records (non-PH center)

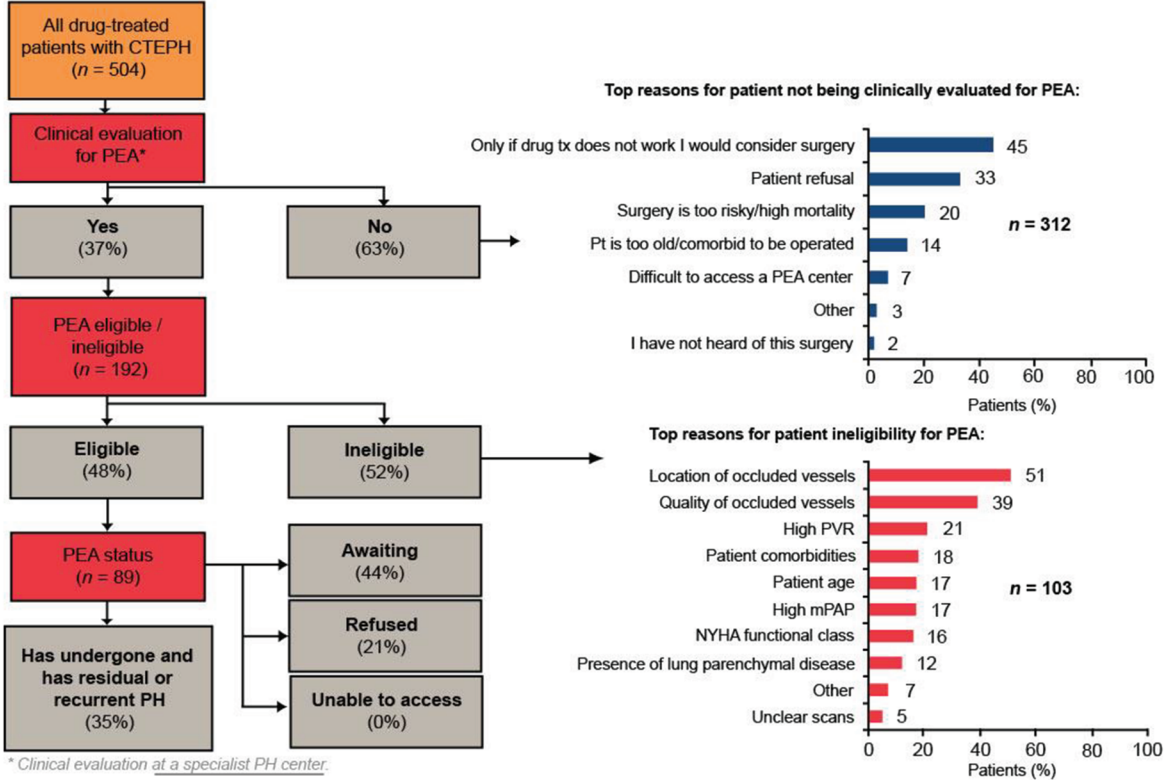

Figure S1. Clinical evaluation for PEA in patients with CTEPH receiving PAH-specific drug therapy in PH centers and non-PH centers (patient record data for patients diagnosed with CTEPH and currently receiving PAH-specific drug therapy). BPA: balloon pulmonary angioplasty; CTEPH: chronic thromboembolic pulmonary hypertension; mPAP: mean pulmonary artery pressure; NYHA: New York Heart Association; PAH: pulmonary arterial hypertension; PEA: pulmonary endarterectomy; PH: pulmonary hypertension; pt: patient; PVR: pulmonary vascular resistance.

C) United States: PH center

Clinical evaluation for PEA in patients with CTEPH receiving PAH-specific drug therapy: patient records (PH center)

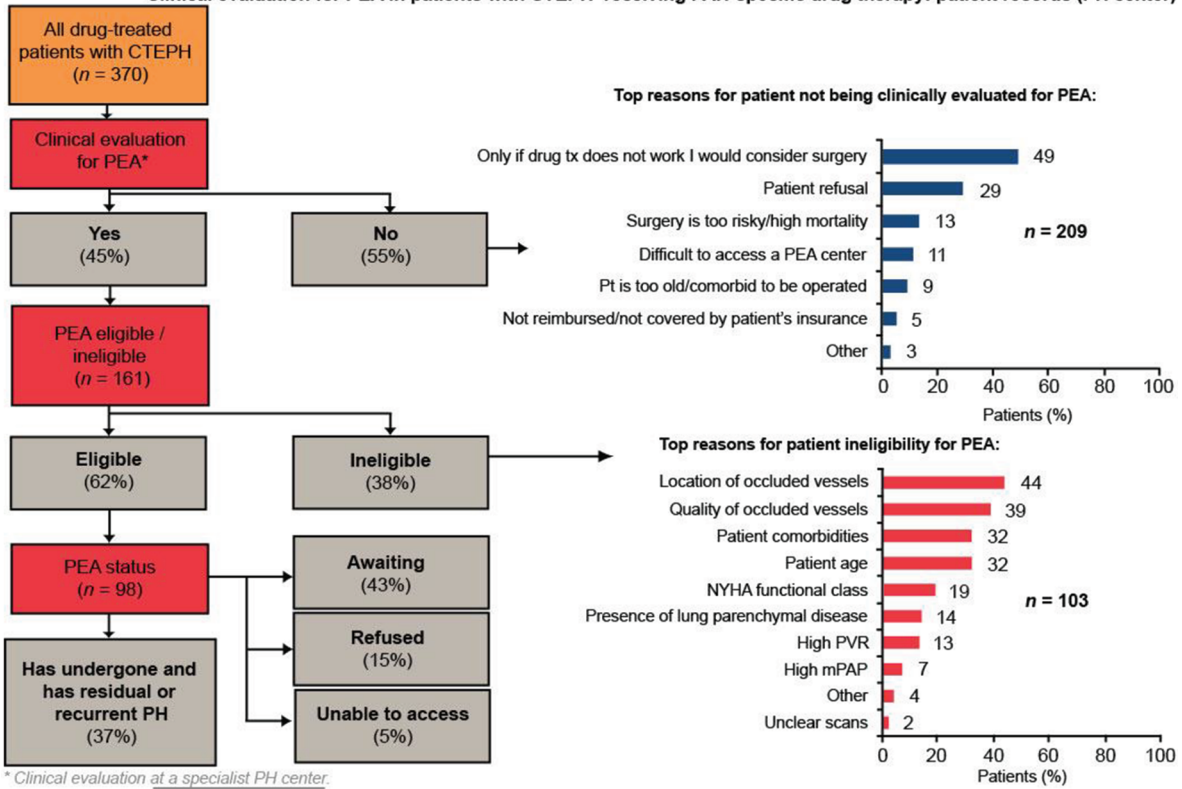

D) United States: non-PH center

Clinical evaluation for PEA in patients with CTEPH receiving PAH-specific drug therapy: patient records (non-PH center)

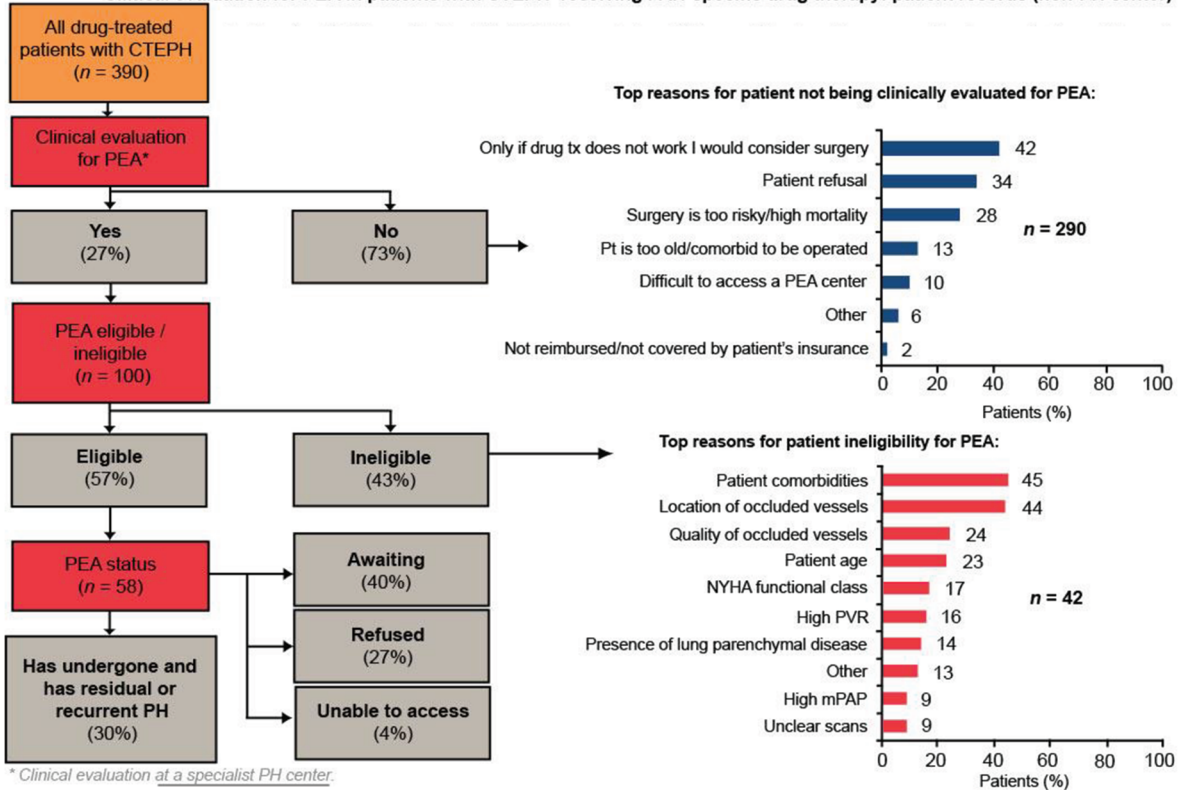

Figure S1 (Continued)



**E) Argentina: PH center**  
**Clinical evaluation for PEA in patients with CTEPH receiving PAH-specific drug therapy: patient records (PH center)**

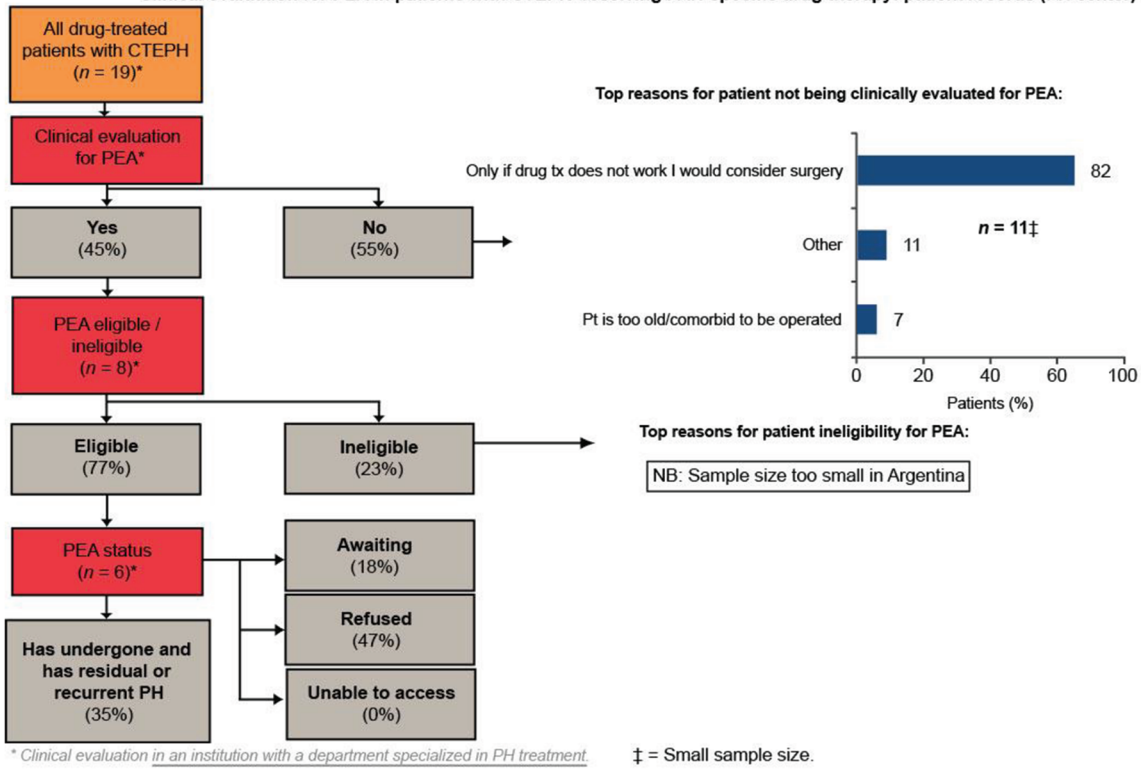

**F) Argentina: non-PH centers**  
**Clinical evaluation for PEA in patients with CTEPH receiving PAH-specific drug therapy: patient records (non-PH center)**

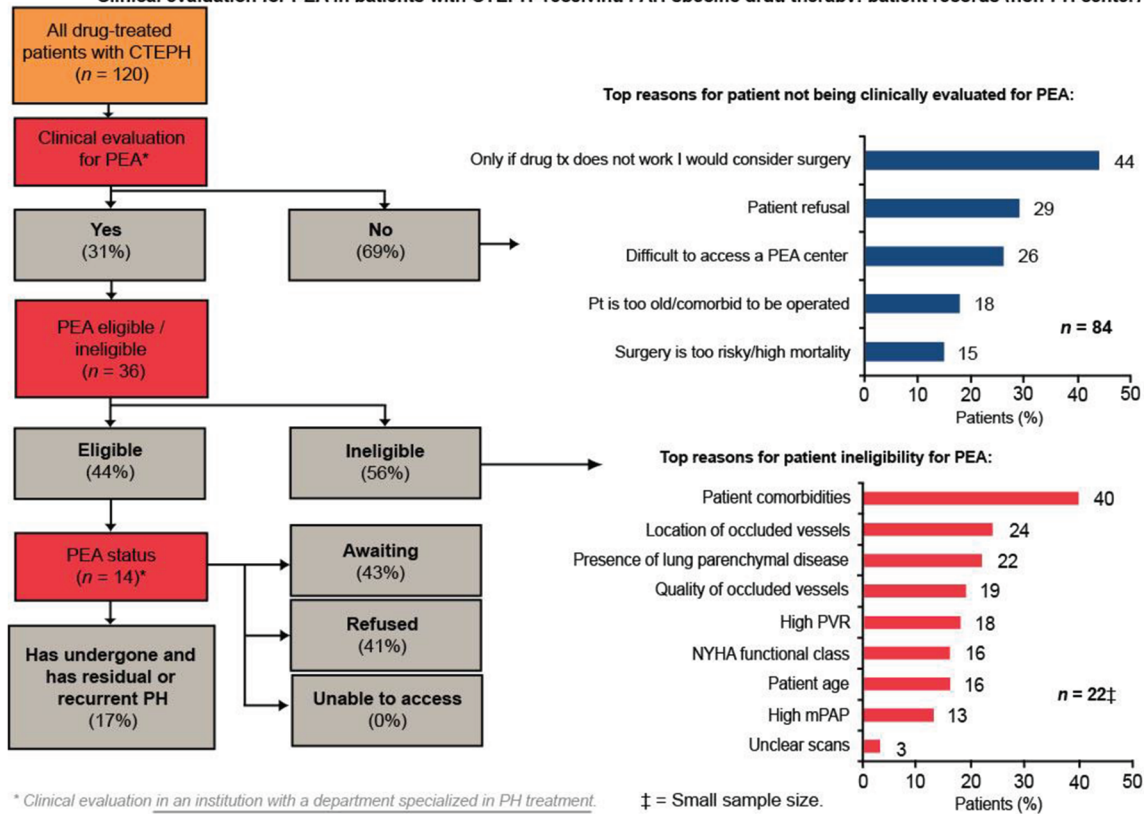

Figure S1 (Continued)

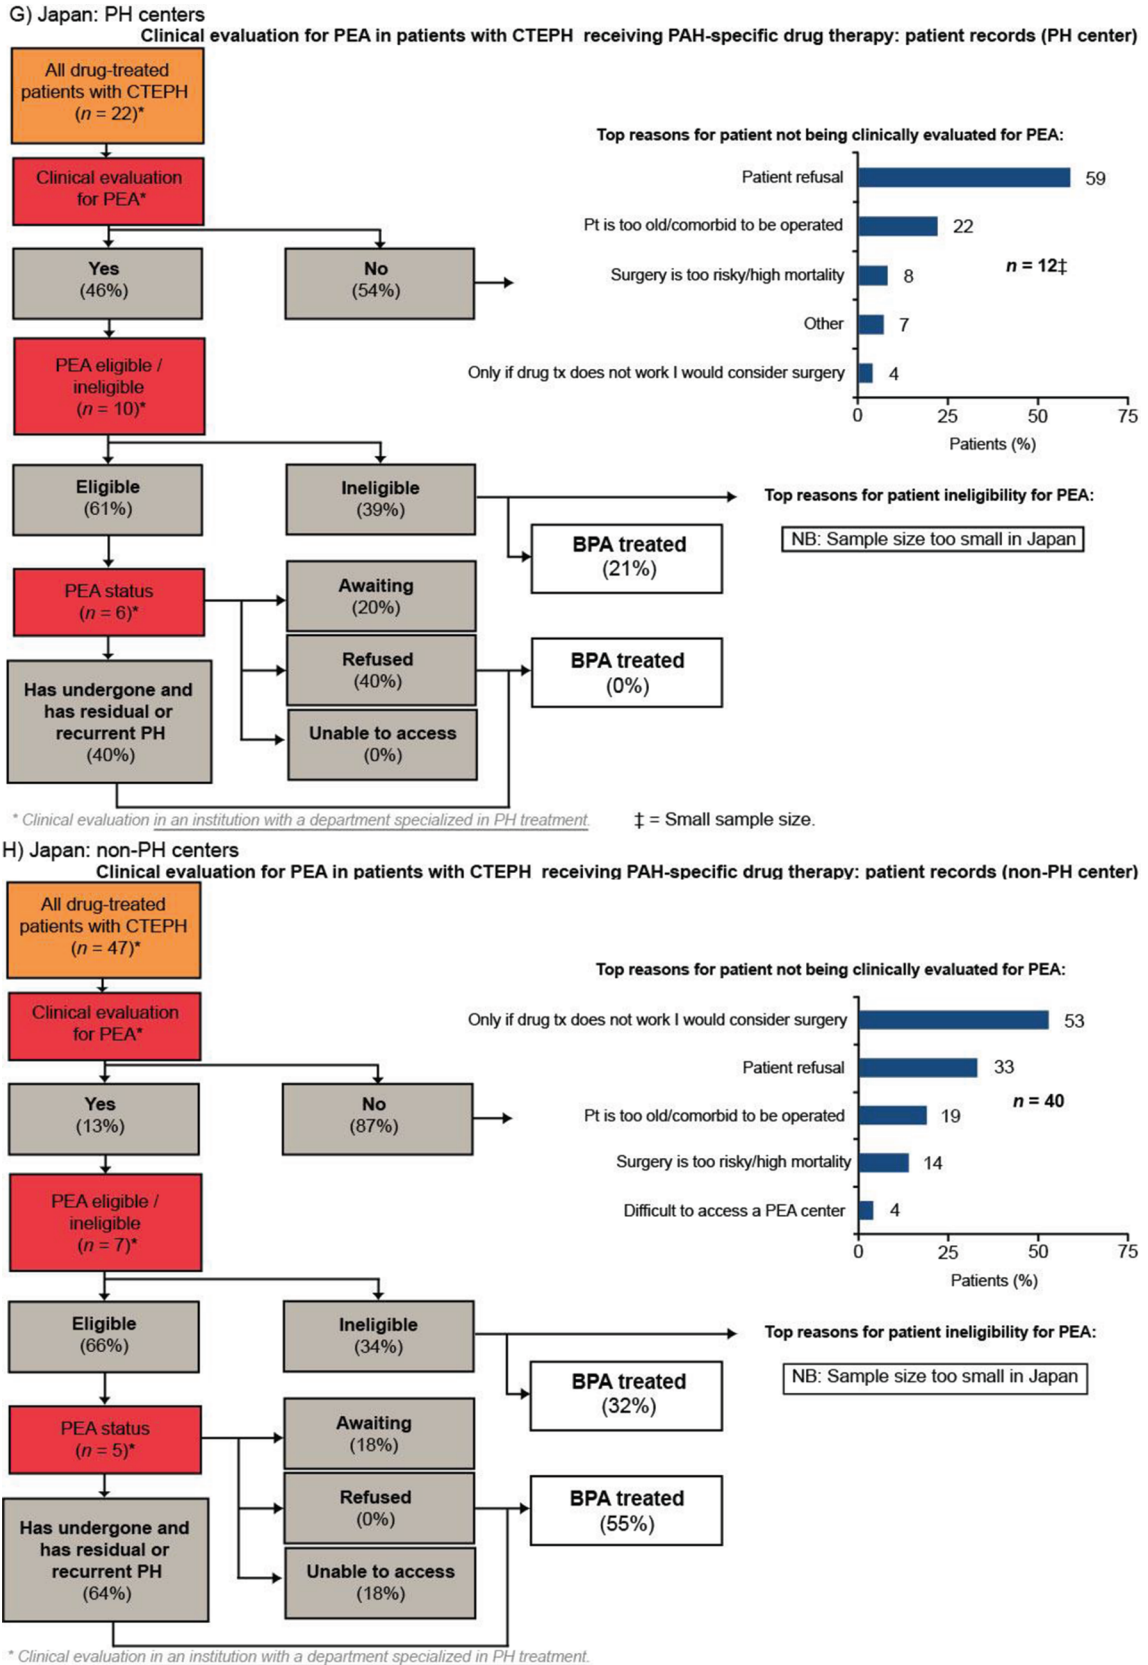

Figure S1 (Continued)

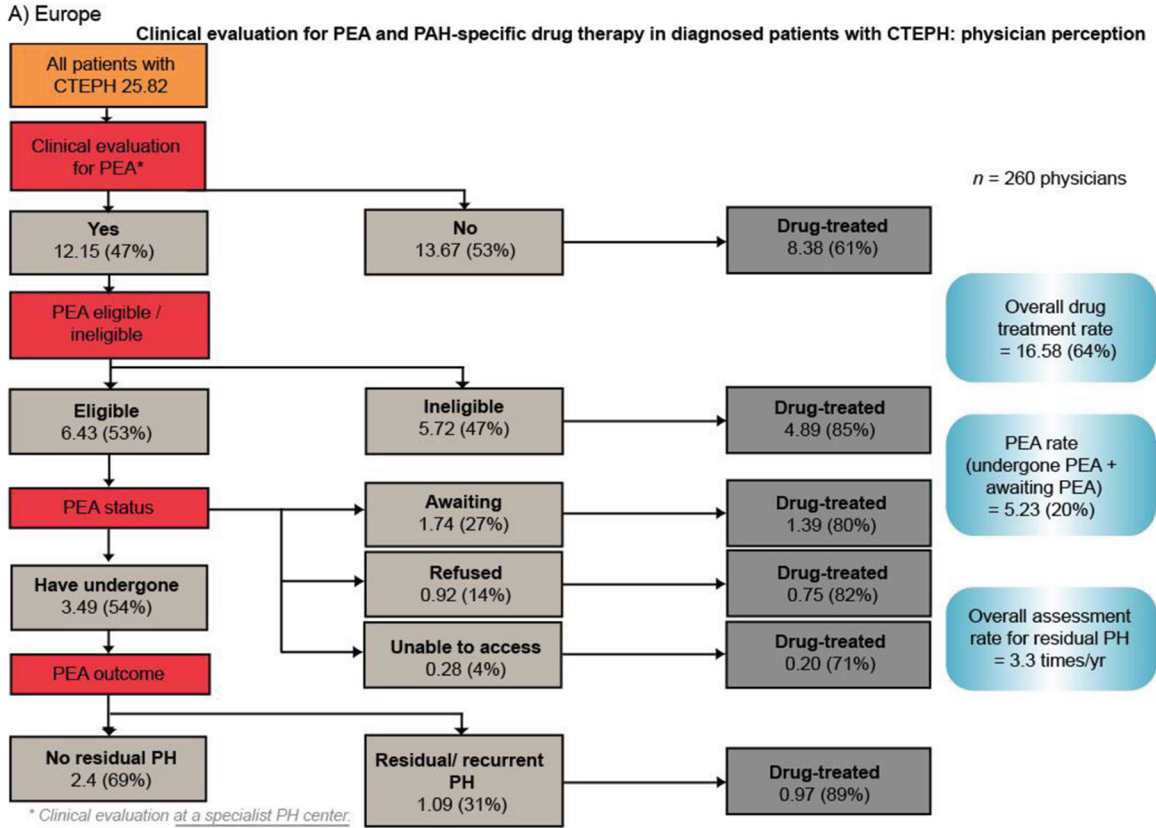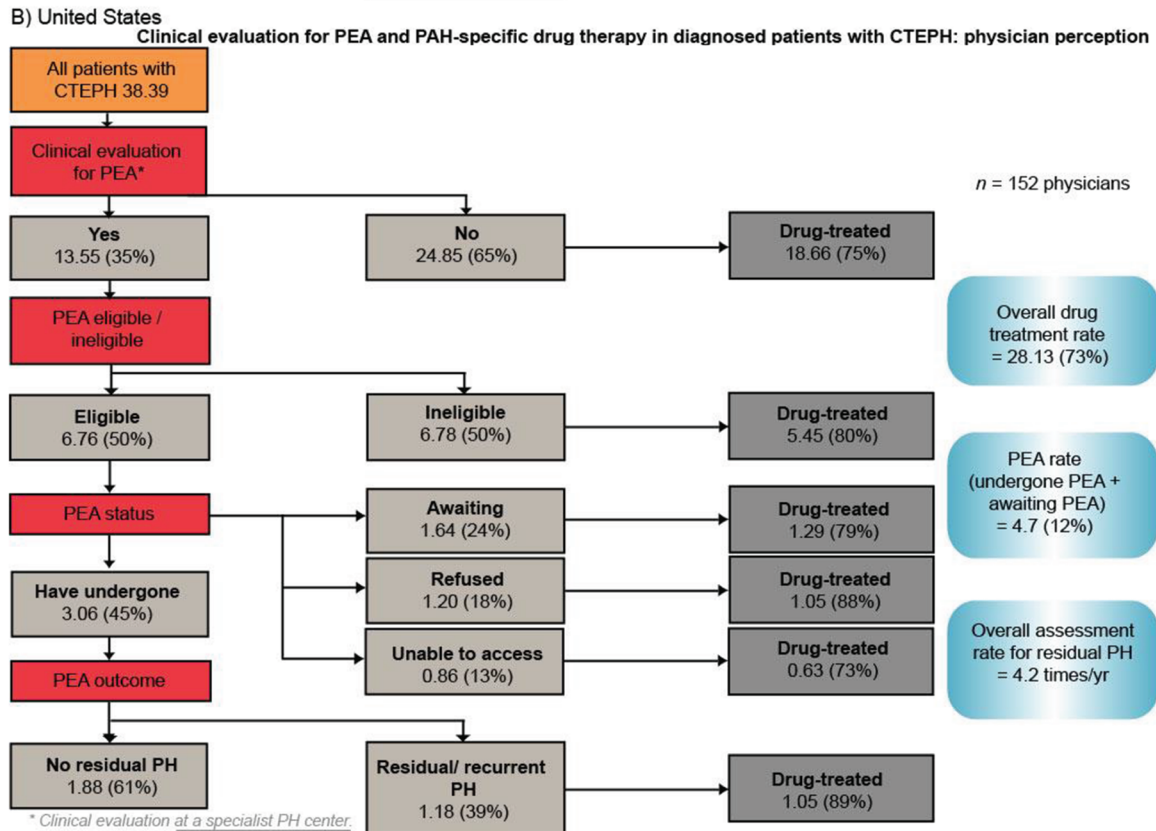

Figure S2. Clinical evaluation for PEA and PAH-specific drug therapy in patients with CTEPH (physician perception data). Numbers are the mean number of patients per physician (percentage of patients as a proportion of each subgroup). BPA: balloon pulmonary angioplasty; CTEPH: chronic thromboembolic pulmonary hypertension; PAH: pulmonary arterial hypertension; PEA: pulmonary endarterectomy; PH: pulmonary hypertension.

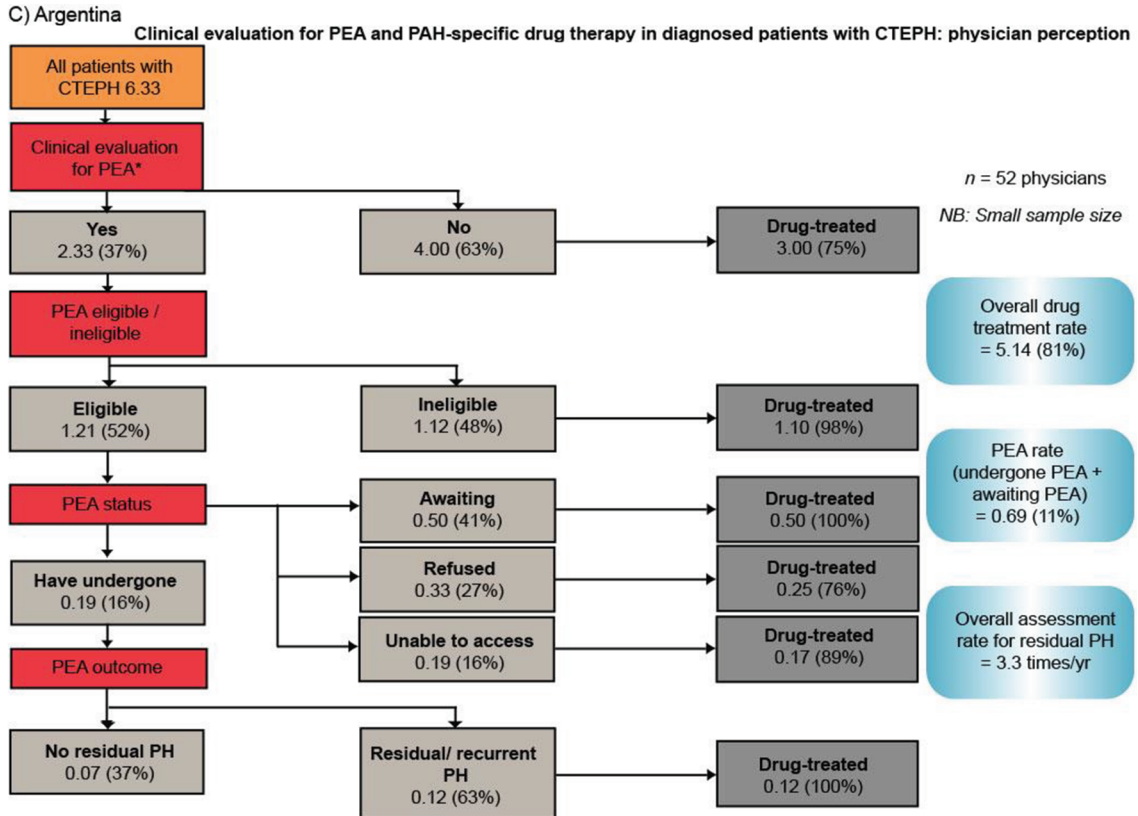

\* Clinical evaluation at an institution with a department specialized in PH treatment.

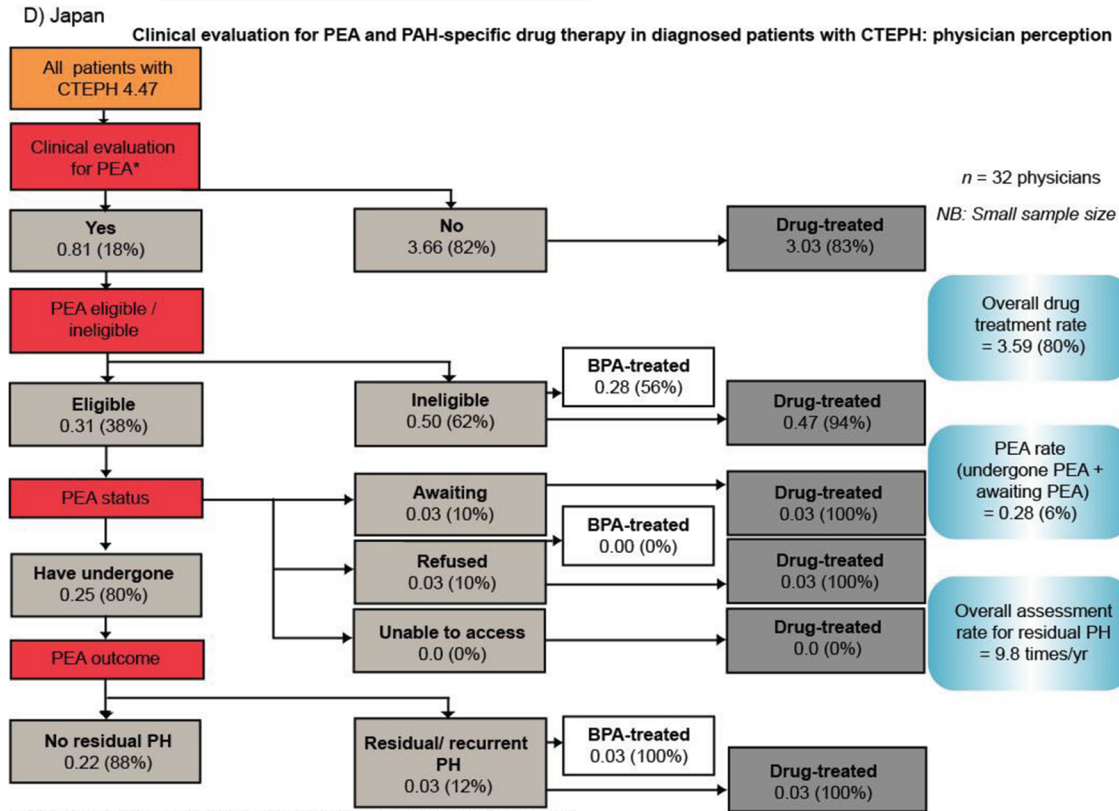

\* Clinical evaluation at an institution with a department specialized in PH treatment.

Figure S2 (Continued)
